# Supplementary material
Source: PubMed Central journal article supplement (PMC3059066)
Supplement: supp_M110.123000_jbc.M110.123000-1.pdf [file supp_M110.123000_jbc.M110.123000-1.pdf]

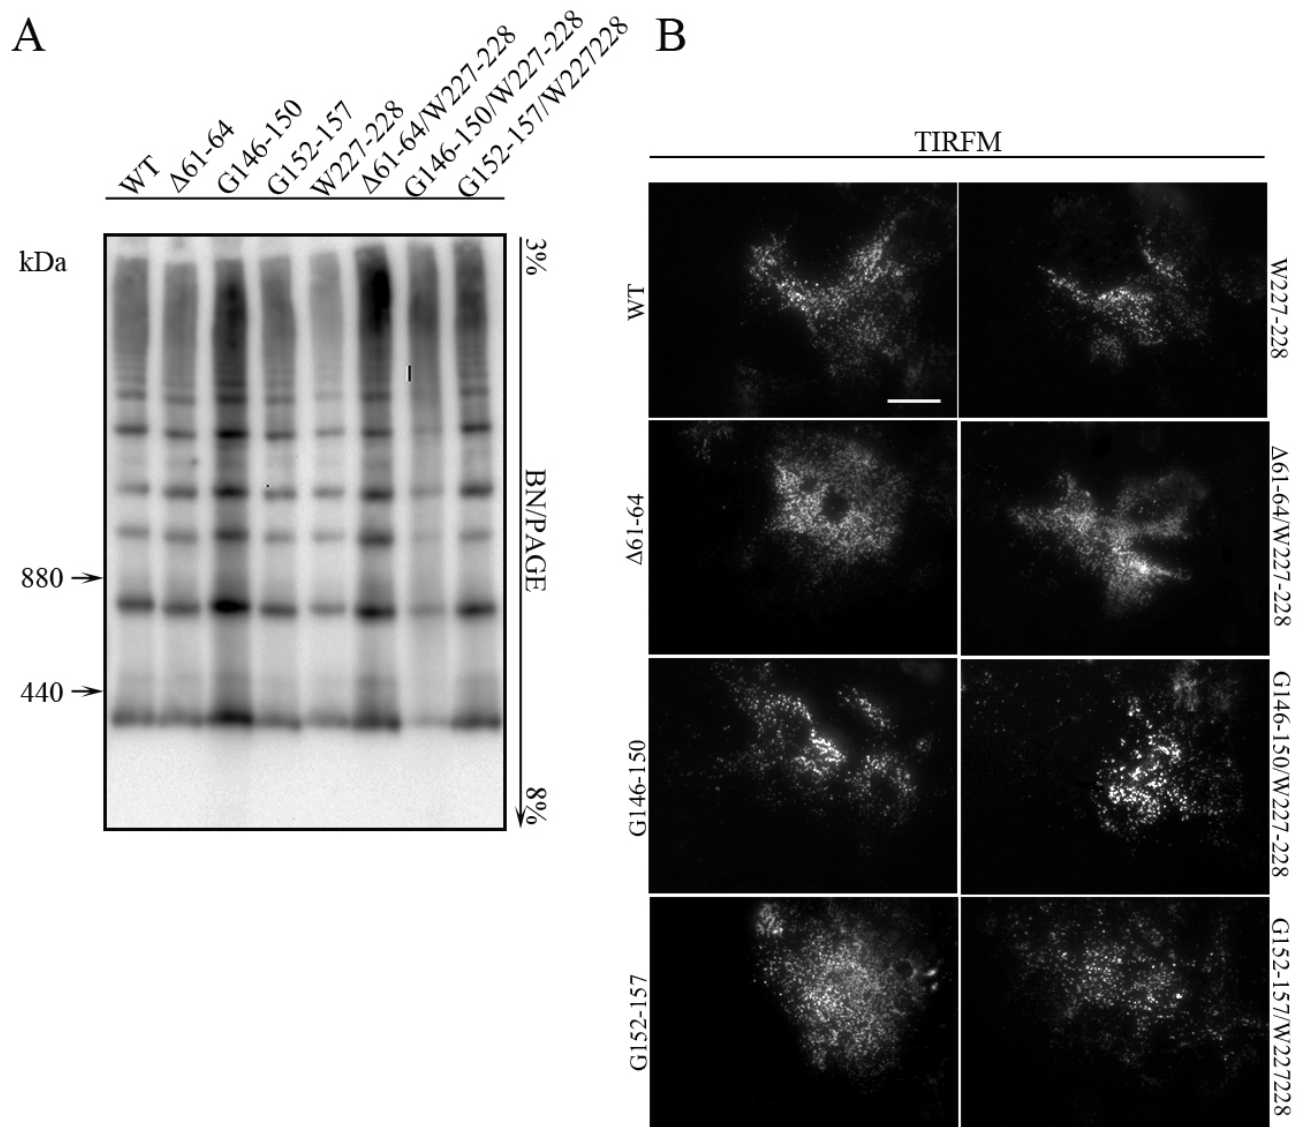

**Supplementary figure 1:**

**OAPs analysis of cells expressing AQP4 mutants**

(A): AQP4 immunoblot performed after BN/PAGE on transferred protein extracted from all the mutants used in this study. Note the presence of several AQP4 bands, similar to wild type, indicating the expression of suprastructure in all mutants. (B): Visualization of AQP4-OAPs by total internal reflection fluorescence microscopy in the same mutants. Scale bar 5 $\mu$ m.
