# Supplementary material
Source: PubMed Central journal article supplement (PMC3059066)
Supplement: supp_M110.123000_Suppl__Fig__2.pdf [file supp_M110.123000_Suppl__Fig__2.pdf]

A

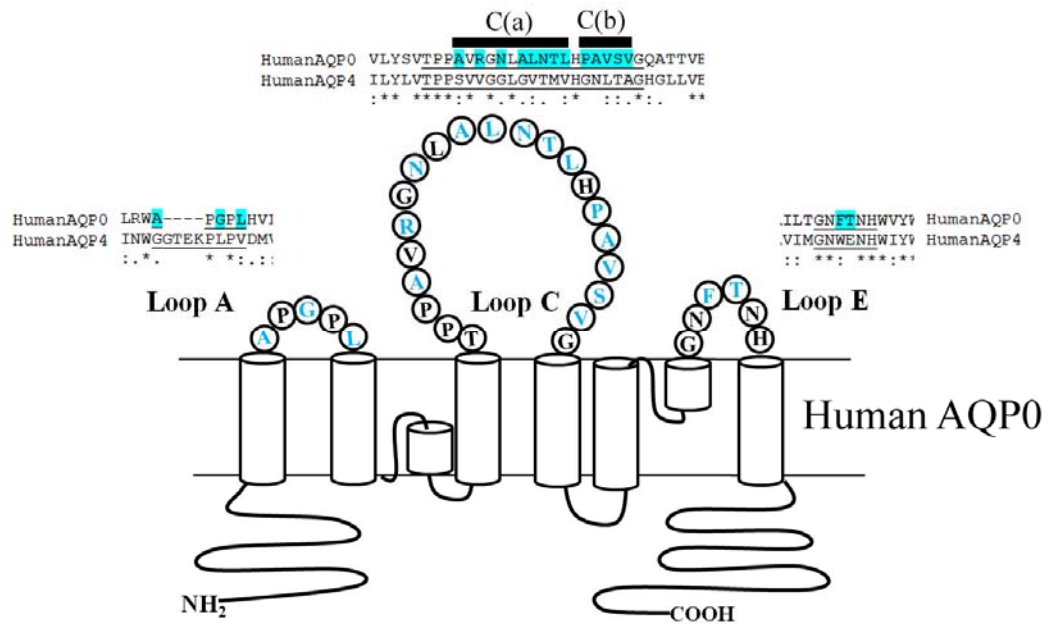

B

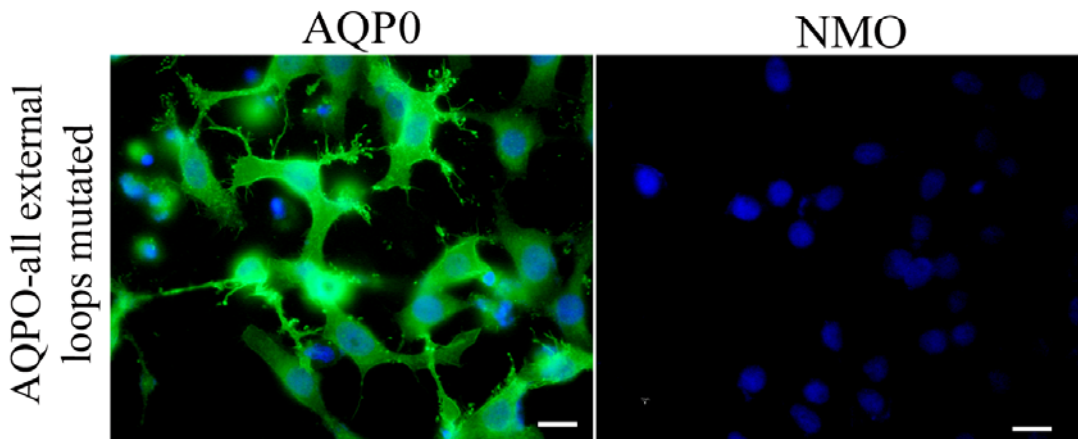

**Supplementary figure 2: Mutagenesis experiments to reconstruct the extracellular AQP4 NMO-IgG epitopes in AQP0.**

(A): Schematic representation of mutations performed in AQP0 extracellular loops to recreate the NMO-IgG epitopes. The mutated aminoacids are highlighted in blue. For more details see table 2.

(B): Immunofluorescence experiments to analyze the NMO-IgG binding using the AQP0 mutant that had all the extracellular loops identical to AQP4. Transfected cells were stained with commercial AQP0 antibodies (AQP0) to verify the correct plasma membrane expression and incubated with NMO-IgG (NMO). No staining was observed with the NMO sera indicating that none of the eleven mutants, including the one that recapitulate AQP4 extracellular loops, was able to generate the NMO-IgG epitope.
